# Supplementary material for: Reproducibility of pharmacogenetics findings for paclitaxel in a heterogeneous population of patients with lung cancer
Source: PubMed Central journal article supplement (PMC6394902; doi:10.1371/journal.pone.0212097), 2019-02-28
Supplement: pone.0212097.s002.pdf [file pone.0212097.s002.pdf]

**Table S1.** Results of univariate screening of variants vs PFS

| SNP        | Missing Genotypes<br>N= | n<6<br>N= | Cox Regression <sup>1</sup><br>P= | Trend Test<br>P= | Exact Trend Test<br>P= | Log-rank Test<br>P= |
|------------|-------------------------|-----------|-----------------------------------|------------------|------------------------|---------------------|
| rs735320   |                         | y         | <b>0.001</b>                      | <b>0.001</b>     | <b>0.003</b>           | <b>0.002</b>        |
| rs171248   |                         |           | <b>0.002</b>                      | <b>0.002</b>     | <b>0.006</b>           | <b>0.003</b>        |
| rs1789915  |                         |           | <b>0.002</b>                      | <b>0.002</b>     | <b>0.007</b>           | <b>0.010</b>        |
| rs207440   |                         | y         | <b>0.003</b>                      | <b>0.009</b>     | 0.035                  | <b>0.008</b>        |
| rs149738   |                         |           | <b>0.005</b>                      | <b>0.004</b>     | 0.017                  | 0.014               |
| rs7483     |                         |           | <b>0.005</b>                      | <b>0.005</b>     | <b>0.003</b>           | <b>0.0004</b>       |
| rs533486   |                         |           | <b>0.006</b>                      | <b>0.004</b>     | 0.017                  | 0.014               |
| rs16947    |                         |           | <b>0.009</b>                      | <b>0.007</b>     | 0.027                  | 0.013               |
| rs13959    |                         |           | <b>0.010</b>                      | <b>0.008</b>     | 0.028                  | 0.018               |
| rs1541290  |                         |           | 0.011                             | <b>0.009</b>     | 0.025                  | <b>0.009</b>        |
| rs1051640  |                         | y         | 0.021                             | 0.037            | 0.11                   | <b>0.008</b>        |
| rs7889839  |                         | y         | 0.032                             | 0.017            | 0.018                  | <b>0.006</b>        |
| rs7886938  |                         | y         | 0.032                             | 0.017            | 0.018                  | <b>0.006</b>        |
| rs2266780  |                         | y         | 0.045                             | 0.041            | 0.034                  | 0.014               |
| rs279942   |                         |           | 0.017                             | 0.015            | 0.038                  |                     |
| rs183574   |                         |           | 0.017                             | 0.016            | 0.044                  |                     |
| rs6851610  |                         | y         | 0.019                             | 0.029            | 0.096                  |                     |
| rs11584174 |                         | y         | 0.025                             | 0.039            | 0.035                  |                     |
| rs8187755  |                         | y         | 0.029                             | 0.066            | 0.13                   |                     |
| rs4149057  |                         |           | 0.039                             | 0.036            | 0.040                  |                     |
| rs6162     |                         |           | 0.048                             | 0.079            | 0.058                  |                     |
| rs1042640  |                         | y         | 0.036                             | 0.033            |                        | 0.025               |
| rs17064    |                         | y         | 0.044                             | 0.037            |                        | 0.019               |
| rs188096   |                         | y         | 0.047                             | 0.039            |                        | 0.038               |
| rs2291075  |                         |           | 0.017                             | 0.015            |                        |                     |
| rs12179    |                         |           | 0.025                             | 0.023            |                        |                     |
| rs1080983  |                         |           | 0.026                             | 0.027            |                        |                     |
| rs1049793  |                         |           | 0.032                             | 0.029            |                        |                     |
| rs10929303 |                         |           | 0.034                             | 0.030            |                        |                     |
| rs1135840  |                         |           | 0.034                             | 0.031            |                        |                     |
| rs1800566  |                         |           | 0.035                             | 0.030            |                        |                     |
| rs1061040  |                         | y         | 0.035                             | 0.031            |                        |                     |
| rs903247   |                         |           | 0.037                             | 0.033            |                        |                     |
| rs3756067  |                         |           | 0.039                             | 0.036            |                        |                     |
| rs11249460 |                         |           | 0.041                             | 0.036            |                        |                     |
| rs2302387  |                         |           | 0.041                             | 0.037            |                        |                     |

|            |    |   |              |       |               |              |
|------------|----|---|--------------|-------|---------------|--------------|
| rs12727968 |    | y | 0.044        | 0.039 |               |              |
| rs3788010  |    |   | 0.044        | 0.041 |               |              |
| rs17216275 |    | y | <b>0.001</b> |       | 0.048         |              |
| rs3862476  |    |   | <b>0.002</b> |       | <b>0.003</b>  |              |
| rs4986782  |    | y | <b>0.002</b> |       | 0.057         |              |
| rs45446698 |    | y | <b>0.005</b> |       | 0.020         |              |
| rs67807361 | 45 | y | <b>0.005</b> |       | 0.088         |              |
| rs45494802 |    | y | <b>0.006</b> |       | 0.021         |              |
| rs3765534  |    | y | <b>0.008</b> |       | 0.16          |              |
| rs8191439  |    | y | <b>0.009</b> |       | 0.059         |              |
| rs4148768  |    |   | <b>0.010</b> |       | <b>0.007</b>  |              |
| rs45467892 | 13 | y | 0.011        |       | 0.032         |              |
| rs67944833 |    | y | 0.011        |       | 0.058         |              |
| rs67944833 |    | y | 0.011        |       | 0.058         |              |
| rs57633837 | 40 |   | 0.013        |       | 0.010         |              |
| rs741817   |    | y | 0.013        |       | 0.012         |              |
| rs7798757  |    | y | 0.016        |       | 0.012         |              |
| rs7899457  |    | y | 0.016        |       | 0.039         |              |
| rs8187706  |    | y | 0.016        |       | 0.039         |              |
| rs1783811  |    | y | 0.016        |       | 0.049         |              |
| rs28399499 |    | y | 0.018        |       | 0.051         |              |
| rs8187838  |    |   | 0.022        |       | 0.016         |              |
| rs4148942  |    | y | 0.027        |       | 0.013         |              |
| rs5769     |    | y | 0.027        |       | 0.16          |              |
| rs915909   |    | y | 0.029        |       | 0.014         |              |
| rs41303343 |    |   | 0.030        |       | 0.019         |              |
| rs1051752  |    | y | 0.030        |       | 0.022         |              |
| rs7623741  |    | y | 0.030        |       | 0.27          |              |
| rs16975056 |    | y | 0.033        |       | 0.018         |              |
| rs10770865 |    | y | 0.033        |       | 0.13          |              |
| rs8177517  |    | y | 0.033        |       | 0.13          |              |
| rs9457846  |    | y | 0.033        |       | 0.13          |              |
| rs8187737  |    | y | 0.039        |       | 0.027         |              |
| rs4808326  |    |   | 0.039        |       | 0.033         |              |
| rs7334118  |    | y | 0.047        |       | 0.034         |              |
| rs28399454 |    | y | 0.049        |       | 0.019         |              |
| rs6196     |    | y |              | 0.019 | <b>0.0002</b> | <b>0.001</b> |
| rs2032588  |    | y |              | 0.047 | 0.020         | 0.014        |
| rs4149056  |    | y |              | 0.081 | 0.009         | 0.026        |
| rs2762934  |    | y |              | 0.11  | 0.040         | 0.32         |

|            |    |   |       |              |              |
|------------|----|---|-------|--------------|--------------|
| rs2470890  |    |   | 0.12  | <b>0.006</b> | <b>0.002</b> |
| rs3731722  |    | y | 0.51  | 0.059        | 0.31         |
| rs2053098  |    |   | 0.047 | 0.015        |              |
| rs55802895 |    | y | 0.22  | 0.059        |              |
| rs886205   |    |   | 0.44  | <b>0.005</b> |              |
| rs2276299  |    | y | 0.45  | 0.065        |              |
| rs2267665  |    | y | 0.045 |              | 0.048        |
| rs1003973  |    | y | 0.047 |              | 0.049        |
| rs2038067  |    | y | 0.047 |              | 0.049        |
| rs2267669  |    | y | 0.047 |              | 0.049        |
| rs2306283  |    |   | 0.047 |              |              |
| rs6980478  |    | y |       | 0.026        | 0.044        |
| rs1229983  |    | y |       | 0.036        | 0.029        |
| rs6163     |    |   |       | 0.015        |              |
| rs3770603  |    | y |       | 0.015        |              |
| rs6792261  |    | y |       | 0.017        |              |
| rs13119049 |    |   |       | 0.020        |              |
| rs13142440 |    |   |       | 0.021        |              |
| rs1064349  | 27 | y |       | 0.021        |              |
| rs17036104 |    | y |       | 0.021        |              |
| rs3731680  |    | y |       | 0.021        |              |
| rs998383   |    |   |       | 0.023        |              |
| rs2297809  |    | y |       | 0.023        |              |
| rs2644905  |    | y |       | 0.024        |              |
| rs4986907  |    | y |       | 0.024        |              |
| rs6193     |    | y |       | 0.024        |              |
| rs8187722  |    | y |       | 0.024        |              |
| rs1800822  |    |   |       | 0.026        |              |
| rs1517618  |    | y |       | 0.027        |              |
| rs10046    |    |   |       | 0.032        |              |
| rs1884725  |    | y |       | 0.034        |              |
| rs6965343  |    |   |       | 0.035        |              |
| rs1056892  |    |   |       | 0.038        |              |
| rs743572   |    |   |       | 0.038        |              |
| rs3748930  |    |   |       | 0.040        |              |
| rs700518   |    |   |       | 0.040        |              |
| rs4783745  |    | y |       | 0.041        |              |
| rs4148949  |    | y |       | 0.042        |              |
| rs55676788 |    |   |       | 0.044        |              |
| rs2277624  |    |   |       | 0.045        |              |

|            |   |       |
|------------|---|-------|
| rs4148951  |   | 0.046 |
| rs7072219  |   | 0.046 |
| rs3842     | y | 0.15  |
| rs17863783 | y | 0.17  |
| rs11678615 | y | 0.25  |

<sup>1</sup>P-value calculated by the Chi-square test.
