# Supplementary material for: Reproducibility of pharmacogenetics findings for paclitaxel in a heterogeneous population of patients with lung cancer
Source: PubMed Central journal article supplement (PMC6394902; doi:10.1371/journal.pone.0212097), 2019-02-28
Supplement: pone.0212097.s004.pdf [file pone.0212097.s004.pdf]

| Covariate           | N   | Strata                 | OR (95% CI)         | P (Wald) |
|---------------------|-----|------------------------|---------------------|----------|
| Race                | 99  | White (68), Non-W (31) | 1.91 (0.639, 5.72)  | 0.25     |
| Histology           | 103 | NSCLC (94), SCLC (9)   | 1.52 (0.177, 13.1)  | 0.69     |
| Stage               | 94  | M0 (47), M1 (47)       | 2.27 (0.711, 7.25)  | 0.16     |
| Second Hand Tobacco | 102 | Yes (86), No (16)      | 1.30 (0.324, 5.19)  | 0.71     |
| No. Prior Therapies | 103 | 0 (73), >0 (30)        | 0.853 (0.275, 2.64) | 0.78     |
| Age                 | 103 | Continuous             | 0.991 (0.939, 1.05) | 0.74     |
| Cig. Pack Years     | 99  | 0 (18), >0 (81)        | 2.72 (0.449, 16.5)  | 0.27     |
