# Supplementary material for: Reproducibility of pharmacogenetics findings for paclitaxel in a heterogeneous population of patients with lung cancer
Source: PubMed Central journal article supplement (PMC6394902; doi:10.1371/journal.pone.0212097), 2019-02-28
Supplement: pone.0212097.s005.pdf [file pone.0212097.s005.pdf]

**Table S2.** Results of univariate screening of variants vs toxicity

| SNP<br>rsID            | Missing<br>Genotypes<br>N= | P1 OR<br>(95% CI) | Fisher's<br>Exact<br>Test <sup>1</sup><br>P= | P2 Somers' D<br>(95% CI) | Exact<br>Trend<br>Test<br>P= | OR<br>(95% CI)   | Fisher's<br>Exact<br>Test <sup>2</sup><br>P= |
|------------------------|----------------------------|-------------------|----------------------------------------------|--------------------------|------------------------------|------------------|----------------------------------------------|
| <i>Thromocytopenia</i> |                            |                   |                                              |                          |                              |                  |                                              |
| rs1051741              |                            |                   | <b>0.001</b>                                 |                          | <b>0.001</b>                 | 16.8 (2.21, 131) | <b>0.002</b>                                 |
| rs1046428              |                            |                   | <b>0.001</b>                                 |                          | <b>0.002</b>                 | 19.9 (2.16, 928) | <b>0.002</b>                                 |
| rs6783962              |                            |                   | <b>0.004</b>                                 | -0.13 (-0.23, -0.04)     | <b>0.003</b>                 |                  |                                              |
| rs7294                 |                            |                   | <b>0.006</b>                                 | 0.11 (0.01, 0.21)        | <b>0.007</b>                 |                  |                                              |
| rs1056522              |                            |                   | 0.021                                        | -0.13 (-0.21, -0.04)     | <b>0.008</b>                 |                  |                                              |
| rs2227291              |                            |                   | 0.039                                        | 0.09 (0.005, 0.18)       | <b>0.010</b>                 |                  |                                              |
| rs894469               |                            |                   | 0.009                                        |                          | 0.009                        |                  | 0.026                                        |
| rs3093105              | 18                         |                   | 0.048                                        |                          | 0.025                        |                  | 0.027                                        |
| rs2297810              |                            |                   | 0.031                                        |                          | 0.062                        |                  | 0.040                                        |
| rs17878544             |                            |                   | 0.024                                        |                          | 0.020                        |                  | 0.091                                        |
| rs10002894             |                            |                   | 0.017                                        |                          | 0.013                        |                  |                                              |
| rs5952696              |                            |                   | 0.018                                        |                          | 0.014                        |                  |                                              |
| rs7879356              |                            |                   | 0.018                                        |                          | 0.014                        |                  |                                              |
| rs3856650              |                            |                   | 0.040                                        |                          | 0.014                        |                  |                                              |
| rs6324                 |                            |                   | 0.016                                        |                          | 0.018                        |                  |                                              |
| rs2359612              |                            |                   | 0.041                                        |                          | 0.018                        |                  |                                              |
| rs1883322              |                            |                   | 0.046                                        |                          | 0.021                        |                  |                                              |
| rs7436962              |                            |                   | 0.046                                        |                          | 0.024                        |                  |                                              |
| rs4643786              |                            |                   | 0.028                                        |                          | 0.025                        |                  |                                              |
| rs6830685              |                            |                   | 0.046                                        |                          | 0.031                        |                  |                                              |
| rs3742106              |                            |                   | 0.050                                        |                          | 0.033                        |                  |                                              |
| rs2468110              |                            |                   | 0.026                                        |                          | 0.035                        |                  |                                              |

|                    |                   |              |                      |              |                                |
|--------------------|-------------------|--------------|----------------------|--------------|--------------------------------|
| rs11764079         |                   | 0.041        |                      | 0.054        |                                |
| rs11770903         |                   | 0.041        |                      | 0.054        |                                |
| rs2295475          |                   | 0.039        |                      | 0.170        |                                |
| rs7515157          |                   | 0.035        |                      | 0.240        |                                |
| rs1799735          |                   | 0.021        |                      | 0.250        |                                |
| rs4418728          |                   | 0.044        |                      | 0.440        |                                |
| rs4986993          |                   | 0.027        |                      | 0.590        |                                |
| rs3755740          |                   | 0.040        |                      | 0.660        |                                |
| rs4803381          |                   | 0.032        |                      | 0.730        |                                |
| rs11231825         |                   | 0.035        |                      | 0.820        |                                |
| rs4679028          |                   | 0.014        |                      |              |                                |
| rs67437265         |                   | 0.023        |                      |              |                                |
| rs1051752          |                   | 0.037        |                      |              |                                |
| rs1801030          |                   | 0.042        |                      |              |                                |
| rs72551385         |                   | 0.042        |                      |              |                                |
| <i>Neutropenia</i> |                   |              |                      |              |                                |
| rs2043449          |                   | <b>0.010</b> |                      | 0.020        | 9.52 (1.59, 66.1) <b>0.005</b> |
| rs7747555          |                   | <b>0.003</b> |                      | <b>0.003</b> | 9.33 (1.42, 57.6) <b>0.009</b> |
| rs6577             |                   | <b>0.004</b> | 0.20 ( 0.04, 0.36)   | <b>0.002</b> |                                |
| rs2180314          |                   | <b>0.005</b> | -0.13 (-0.23, -0.04) | <b>0.002</b> |                                |
| rs1695             |                   | <b>0.004</b> | 0.13 (0.02, 0.24)    | <b>0.003</b> |                                |
| rs2277448          |                   | 0.012        | -0.13 (-0.23, -0.04) | <b>0.004</b> |                                |
| rs4715354          |                   | 0.019        | -0.12 (-0.21, -0.02) | <b>0.009</b> |                                |
| rs910795           |                   | 0.019        | 0.13 (-0.01, 0.27)   | <b>0.010</b> |                                |
| rs4715333          |                   | 0.020        | -0.14 (-0.24, -0.04) | <b>0.010</b> |                                |
| rs1645691          | 18.2 (1.82, 164)  | <b>0.006</b> |                      |              |                                |
| rs1801030          | 9.44 (1.44, 58.3) | <b>0.009</b> |                      |              |                                |
| rs2341968          | 13.5 (1.48, 103)  | <b>0.010</b> |                      |              |                                |

|            |       |              |       |
|------------|-------|--------------|-------|
| rs9474342  | 0.011 | 0.063        | 0.015 |
| rs11211402 | 0.029 | 0.027        | 0.023 |
| rs1517618  | 0.015 | 0.012        | 0.024 |
| rs1061040  | 0.012 | <b>0.010</b> | 0.029 |
| rs2397118  | 0.017 | 0.017        | 0.035 |
| rs1565814  | 0.039 | 0.069        | 0.039 |
| rs1645694  | 0.038 | 0.033        | 0.045 |
| rs7081     | 0.031 | 0.027        | 0.089 |
| rs2738792  | 0.034 | 0.023        | 0.120 |
| rs5085     | 0.043 | 0.054        | 0.430 |
| rs1137115  | 0.002 | 0.740        | 0.470 |
| rs1046428  | 0.020 | 0.081        | 0.680 |
| rs2020869  | 0.021 | 0.150        | 0.680 |
| rs11550605 | 0.037 | 1.000        | 0.680 |
| rs10249788 | 0.004 | 0.750        | 0.710 |
| rs4715332  | 0.028 | 0.019        |       |
| rs818202   | 0.043 | 0.022        |       |
| rs11684227 | 0.048 | 0.027        |       |
| rs11764079 | 0.017 | 0.035        |       |
| rs11770903 | 0.017 | 0.035        |       |
| rs7957203  | 0.001 | 0.180        |       |
| rs4926802  | 0.039 | 0.410        |       |
| rs939336   | 0.045 | 0.430        |       |
| rs2242046  | 0.027 | 0.610        |       |
| rs2268873  | 0.046 | 0.760        |       |
| rs2301157  | 0.003 | 1.000        |       |
| rs2066853  | 0.027 | 1.000        |       |
| rs2305367  | 0.049 | 1.000        |       |
| rs67944833 | 0.016 |              |       |

|                         |              |                      |              |       |
|-------------------------|--------------|----------------------|--------------|-------|
| rs67944833              | 0.016        |                      |              |       |
| rs915909                | 0.030        |                      |              |       |
| rs1059491               | 0.031        |                      |              |       |
| rs2550915               | 0.048        |                      |              |       |
| rs4407290               | 0.048        |                      |              |       |
| rs28399499              | 0.049        |                      |              |       |
| <i>Any Hemotoxicity</i> |              |                      |              |       |
| rs6577                  | <b>0.006</b> | 0.23 (0.05, 0.41)    | <b>0.003</b> |       |
| rs910795                | <b>0.009</b> | 0.18 (0.02, 0.34)    | <b>0.005</b> |       |
| rs1695                  | <b>0.008</b> | 0.14 (0.01, 0.27)    | <b>0.007</b> |       |
| rs2277448               | 0.015        | -0.16 (-0.28, -0.04) | <b>0.007</b> |       |
| rs2180314               | 0.022        | -0.16 (-0.27, -0.05) | <b>0.009</b> |       |
| rs28365062              | 0.020        |                      | 0.027        | 0.016 |
| rs1046428               | 0.007        |                      | 0.004        | 0.019 |
| rs7853758               | 0.043        |                      | 0.045        | 0.031 |
| rs2884737               | 0.010        |                      | 0.120        | 0.031 |
| rs11211402              | 0.045        |                      | 0.047        | 0.032 |
| rs2297810               | 0.032        |                      | 0.015        | 0.038 |
| rs2276707               | 0.048        |                      | 0.049        | 0.041 |
| rs7200749               | 0.025        |                      | 0.017        | 0.042 |
| rs1051741               | 0.020        |                      | 0.020        | 0.042 |
| rs894469                | 0.020        |                      | 0.020        | 0.042 |
| rs8023604               | 0.047        |                      | 0.064        | 0.042 |
| rs17882539              | 0.049        |                      | 0.031        | 0.044 |
| rs4643786               | 0.004        |                      | 0.004        | 0.048 |

|            |       |       |       |
|------------|-------|-------|-------|
| rs17878544 | 0.008 | 0.009 | 0.057 |
| rs3805114  | 0.035 | 0.035 | 0.077 |
| rs9474342  | 0.050 | 0.180 | 0.077 |
| rs7747555  | 0.036 | 0.036 | 0.079 |
| rs2268877  | 0.022 | 0.630 | 0.150 |
| rs1137115  | 0.010 | 1.000 | 0.390 |
| rs2738792  | 0.031 | 0.088 | 0.550 |
| rs2268873  | 0.013 | 0.810 | 0.570 |
| rs4803381  | 0.044 | 0.450 | 0.770 |
| rs1060253  | 0.045 | 0.340 | 1.000 |
| rs1051332  | 0.011 | 0.011 |       |
| rs11764079 | 0.027 | 0.011 |       |
| rs11770903 | 0.027 | 0.011 |       |
| rs5952696  | 0.026 | 0.019 |       |
| rs7879356  | 0.026 | 0.019 |       |
| rs1881668  | 0.044 | 0.021 |       |
| rs1056522  | 0.009 | 0.030 |       |
| rs4715333  | 0.033 | 0.030 |       |
| rs10002894 | 0.045 | 0.033 |       |
| rs1801249  | 0.029 | 0.036 |       |
| rs732774   | 0.032 | 0.036 |       |
| rs4926802  | 0.013 | 0.038 |       |
| rs2295475  | 0.029 | 0.039 |       |
| rs6830685  | 0.050 | 0.047 |       |
| rs3775770  | 0.026 | 0.076 |       |
| rs6783962  | 0.040 | 0.140 |       |

|            |       |       |
|------------|-------|-------|
| rs1340990  | 0.040 | 0.300 |
| rs2066853  | 0.039 | 0.490 |
| rs1736565  | 0.040 | 0.660 |
| rs4986993  | 0.022 | 1.000 |
| rs2341968  | 0.006 |       |
| rs1801030  | 0.016 |       |
| rs28693844 | 0.018 |       |
| rs59443548 | 0.018 |       |
| rs16840132 | 0.018 |       |
| rs17215633 | 0.018 |       |
| rs2550915  | 0.018 |       |
| rs6921269  | 0.018 |       |
| rs4679028  | 0.019 |       |
| rs11568373 | 0.033 |       |
| rs1645691  | 0.033 |       |
| rs61743418 | 0.039 |       |
| rs72554635 | 0.039 |       |
| rs72554636 | 0.039 |       |
| rs2234934  | 0.039 |       |
| rs8187801  | 0.049 |       |
| rs12721607 | 0.049 |       |
| rs67944833 | 0.049 |       |
| rs67944833 | 0.049 |       |
| rs741817   | 0.050 |       |
| rs6577     | 0.006 |       |
| rs910795   | 0.009 |       |

|            |       |
|------------|-------|
| rs1695     | 0.008 |
| rs2277448  | 0.015 |
| rs2180314  | 0.022 |
| rs28365062 | 0.020 |
| rs1046428  | 0.007 |
| rs7853758  | 0.043 |
| rs2884737  | 0.010 |
| rs11211402 | 0.045 |
| rs2297810  | 0.032 |
| rs2276707  | 0.048 |
| rs7200749  | 0.025 |
| rs1051741  | 0.020 |
| rs894469   | 0.020 |
| rs8023604  | 0.047 |
| rs17882539 | 0.049 |
| rs4643786  | 0.004 |
| rs17878544 | 0.008 |
| rs3805114  | 0.035 |
| rs9474342  | 0.050 |
| rs7747555  | 0.036 |
| rs2268877  | 0.022 |
| rs1137115  | 0.010 |
| rs2738792  | 0.031 |
| rs2268873  | 0.013 |
| rs4803381  | 0.044 |
| rs1060253  | 0.045 |

|            |       |
|------------|-------|
| rs1051332  | 0.011 |
| rs11764079 | 0.027 |
| rs11770903 | 0.027 |
| rs5952696  | 0.026 |
| rs7879356  | 0.026 |
| rs1881668  | 0.044 |
| rs1056522  | 0.009 |
| rs4715333  | 0.033 |
| rs10002894 | 0.045 |
| rs1801249  | 0.029 |
| rs732774   | 0.032 |

<sup>1</sup>Mehta's modification to Fisher's Exact test were conducted where appropriate.

<sup>2</sup>Combined categories with small sample sizes.
